# Supplementary material for: Photosensitized Thermoplastic Nano-Photocatalysts Active in the Visible Light Range for Potential Applications Inside Extraterrestrial Facilities
Source: MDPI journal article supplement (doi:10.3390/nano12060996), 2022-03-17
Supplement: s1 [file s1]

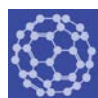

Supplementary Materials

# Photosensitized Thermoplastic Nano-Photocatalysts Active in the Visible Light Range for Potential Applications Inside Extraterrestrial Facilities

Lidia Mezzina <sup>1</sup>, Angelo Nicosia <sup>1</sup>, Fabiana Vento <sup>1</sup>, Guido De Guidi <sup>1</sup> and Placido Giuseppe Mineo <sup>1,2,3,\*</sup>

<sup>1</sup> Department of Chemical Sciences and INSTM UdR of Catania, University of Catania, V.le A. Doria 6, I-95125 Catania, Italy; lidia.mezzina@phd.unict.it (L.M.); angelo.nicosia@unict.it (A.N.); fabiana.vento@phd.unict.it (F.V.); guido.deguidi@unict.it (G.D.G.)

<sup>2</sup> Institute for Chemical and Physical Processes, National Research Council (IPCF-CNR), Viale F. Stagno d'Alcontres 37, I-98158 Messina, Italy

<sup>3</sup> Institute of Polymers, Composites and Biomaterials, National Research Council (IPCB-CNR), Via P. Gaifami 18, I-95126 Catania, Italy

\* Correspondence: placido.mineo@unict.it

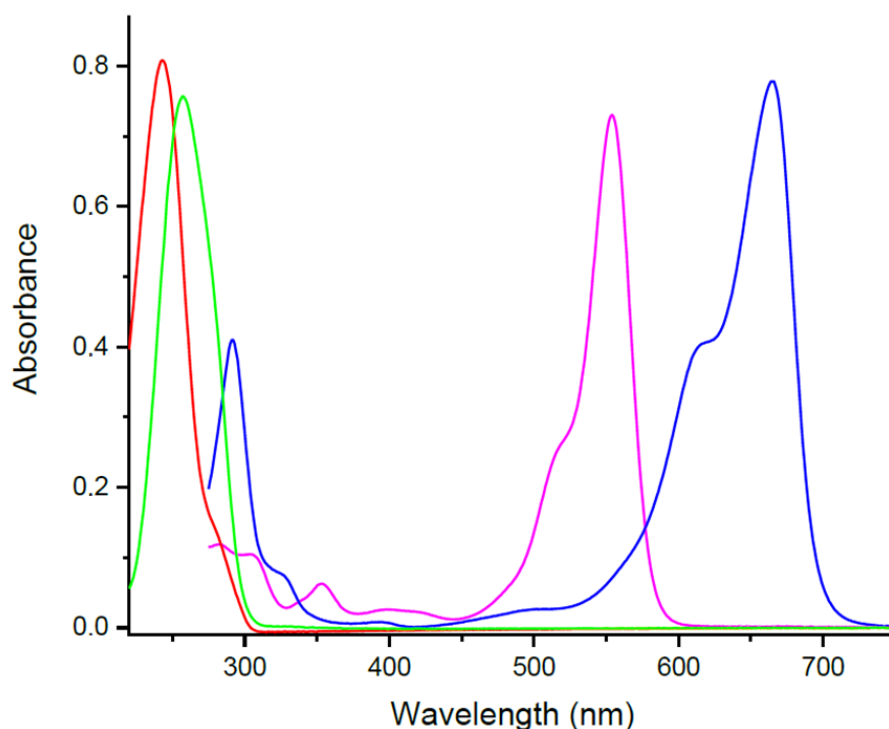

**Figure S1.** UV-Vis spectra of Acetaminophen (red line), Paraquat (green line), Rhodamine B (magenta line) and Methylene Blue (blue line).

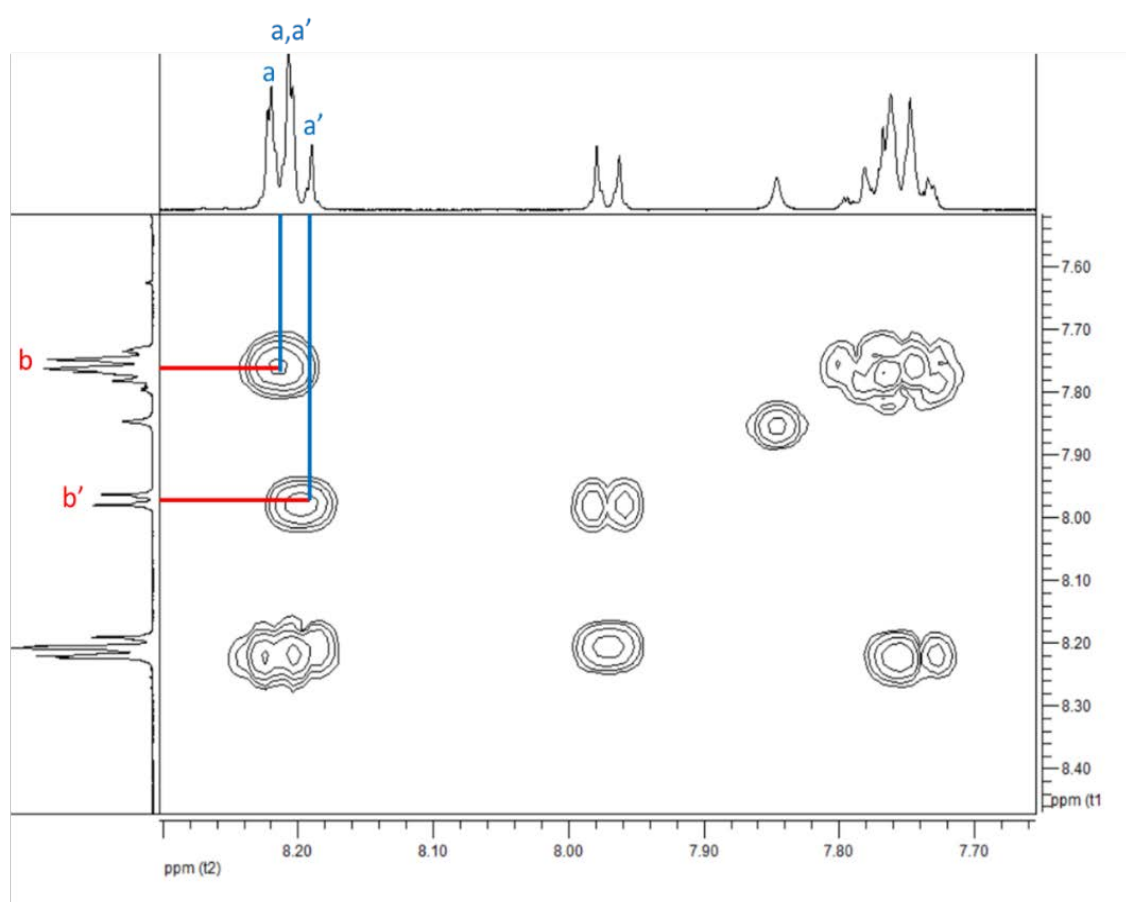

**Figure S2.**  $^1\text{H}$ - $^1\text{H}$  COSY spectrum of the MAP macromonomer (range, 7–9 ppm).
